# Supplementary material for: Integrating accelerometry, GPS, GIS and molecular data to investigate mechanistic pathways of the urban environmental exposome and cognitive outcomes in older adults: a longitudinal study protocol
Source: HighWire-hosted journal article supplement (doi:10.1136/bmjopen-2024-085318), 2024-12-01
Supplement: bmjopen-2024-085318supp001_data_supplement.pdf [file bmjopen-2024-085318supp001_data_supplement.pdf]

Supplementary Figure 1. Study timeline.

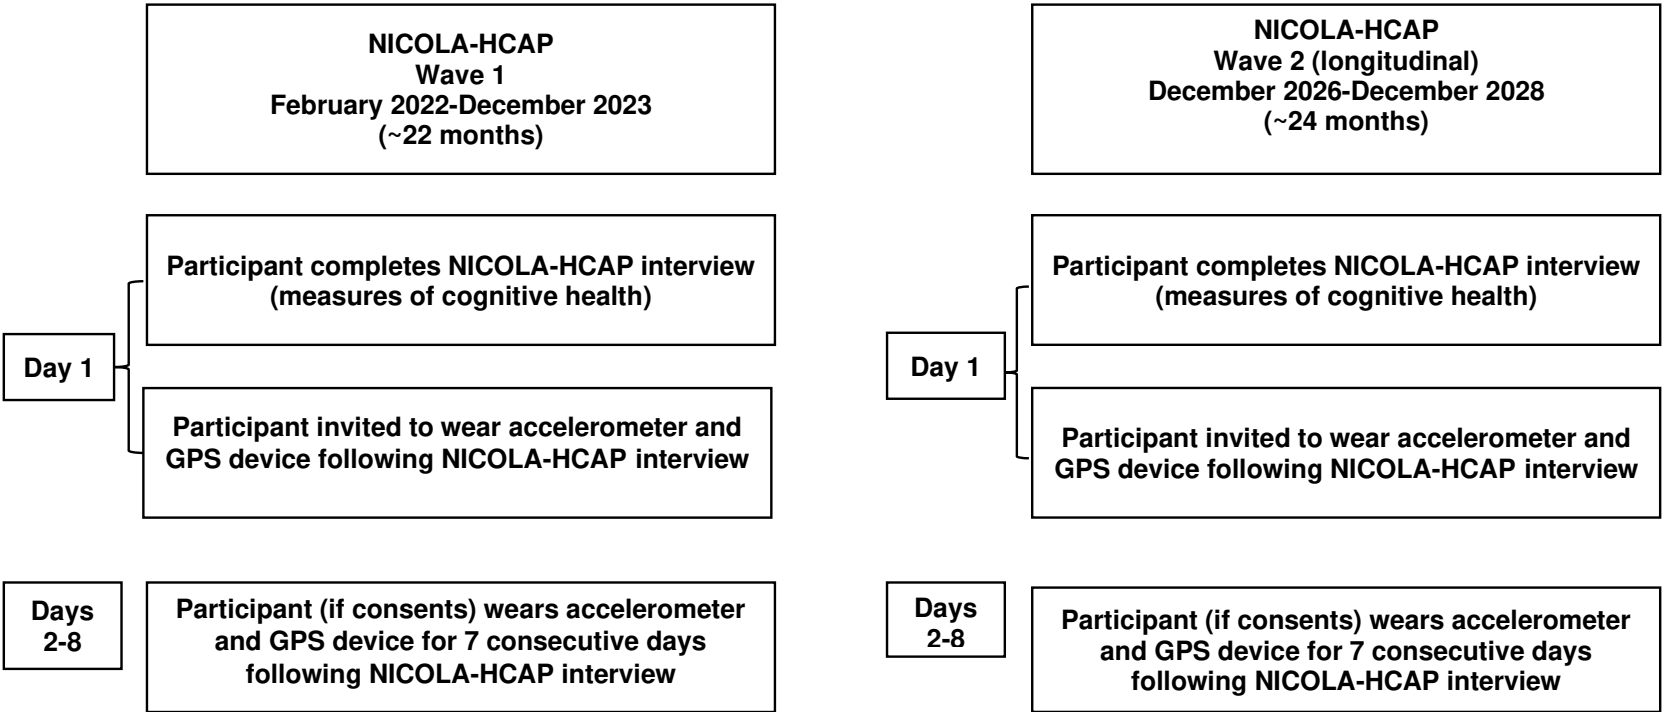

NICOLA-HCAP: Northern Ireland Cohort for the Longitudinal Study of Ageing-Harmonised Cognitive Assessment Protocol.

Supplementary Table 1. Blood-derived biochemical markers.

| Blood-derived biochemical markers (n=28) |
|------------------------------------------|
| Alanine aminotransferase                 |
| Albumin                                  |
| Alkaline Phosphatase                     |
| Apolipoprotein A                         |
| Apolipoprotein B                         |
| Aspartate aminotransferase               |
| Calcium                                  |
| Cholesterol                              |
| Creatinine                               |
| Cystatin C                               |
| Direct Bilirubin                         |
| Direct low-density lipoprotein           |
| Gamma glutamyltransferase                |
| Glucose                                  |
| High density lipoprotein                 |
| High sensitivity C-reactive protein      |
| Lipoprotein A                            |
| Oestradiol                               |
| Phosphate                                |
| Rheumatoid factor                        |
| Sex hormone binding globulin             |
| Testosterone                             |
| Total Bilirubin                          |
| Total protein                            |
| Triglyceride                             |
| Urate                                    |
| Urea                                     |
| Vitamin D                                |
